# Supplementary material for: On-Demand Healthcare Platforms: Impact of Question and Answer Service on Online Consultations and Offline Appointments
Source: Atypon-hosted journal article supplement (doi:10.1287/isre.2023.0644), 2025-07-10
Supplement: isre.2023.0644.sm1.pdf [file isre.2023.0644.sm1.pdf]

## Supplementary Online Appendices

for

# On-Demand Healthcare Platforms: Impact of Q&A Service on Online Consultations and Offline Appointments

### A.1. Additional Figures and Tables

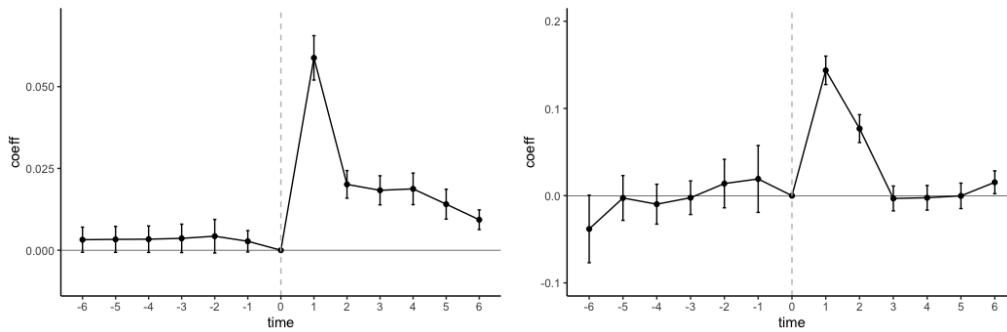

*Notes:* This plot includes the estimated coefficients and 95% confidence intervals from the dynamic DID model. Time is normalized relative to the adoption month. The regression includes individual fixed effects and time fixed effects. Standard errors are clustered at the individual level.

**Figure A1 Event Study Plots**

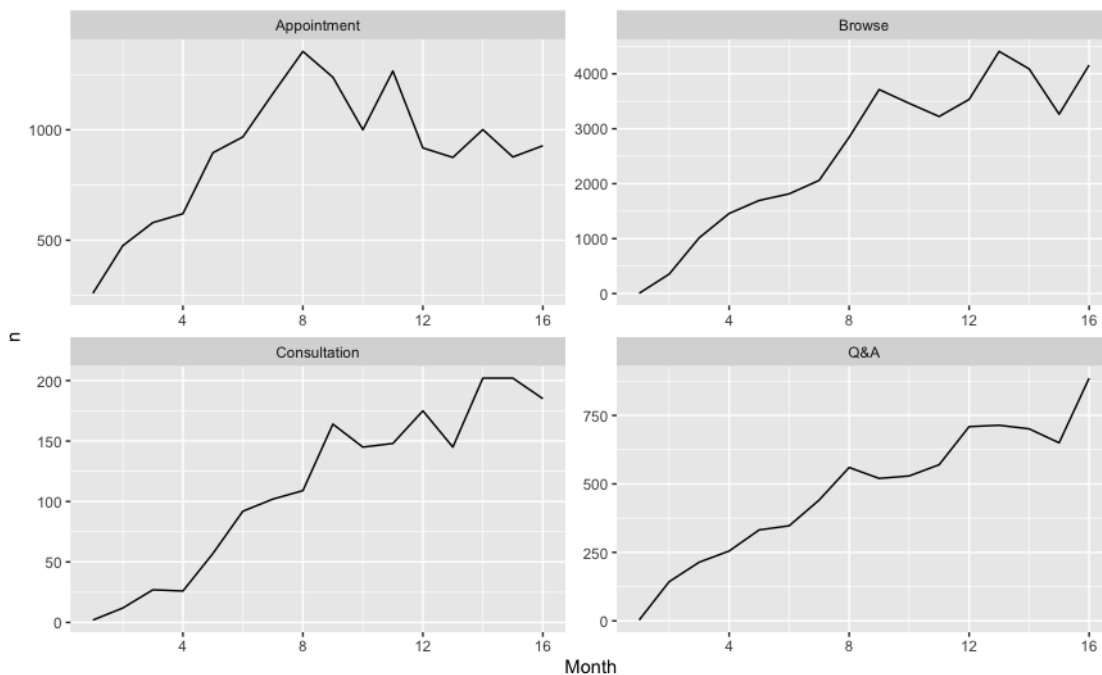

**Figure A2 Trends in Platform Engagement Among Q&A Adopters**

**Panel A: No Anticipation**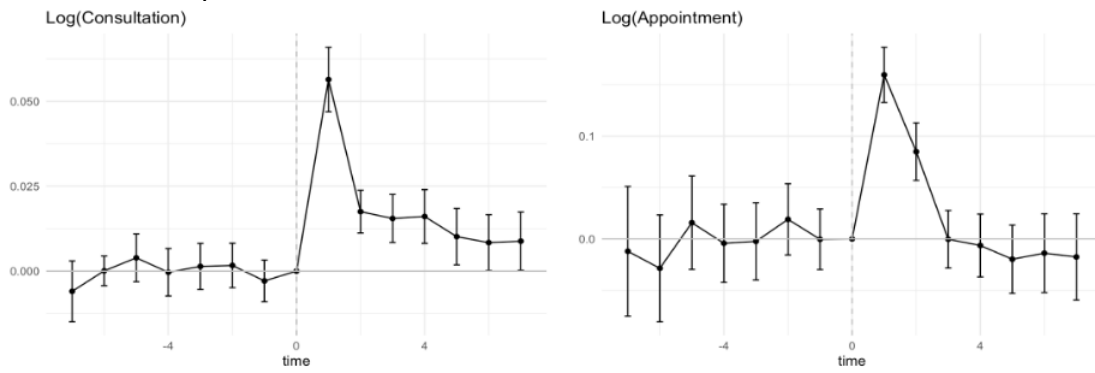**Panel B: One-Period Anticipation**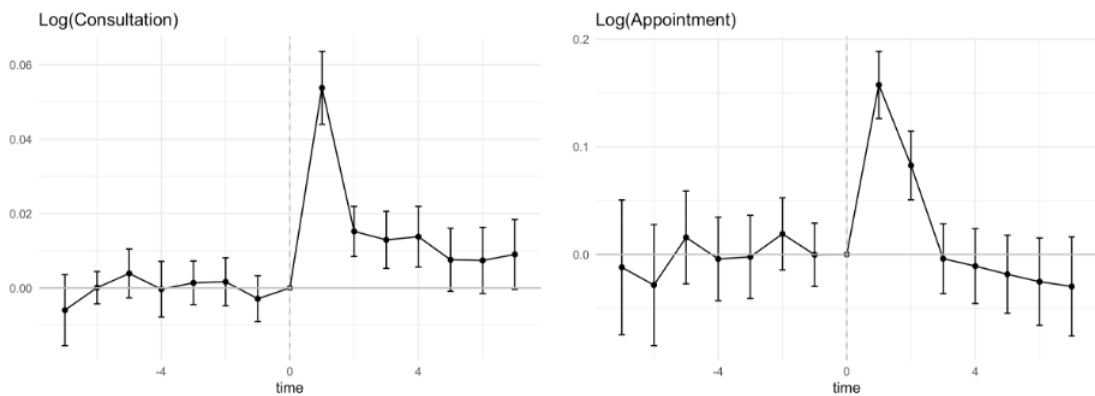

*Notes:* This plot includes the estimated coefficients and 95% confidence intervals from the CS-DID model. Time is normalized relative to the adoption month. The regression includes individual fixed effects and time fixed effects. Standard errors are clustered at the individual level.

**Figure A3 Event Study Plots Based on CS-DID Estimator**

**Table A1** Statistics of Consultation, Appointment, Q&A, and Browse in Each Medical Specialty.

| Specialty        | Consultation | Appointment | Q&A   | Browse  |
|------------------|--------------|-------------|-------|---------|
| Cardiology       | 540          | 35,540      | 52    | 2,521   |
| Colorectal       | 407          | 7,390       | 109   | 6,724   |
| Dermatology      | 4,345        | 68,858      | 615   | 45,594  |
| ED               | 13           | 5,713       | 39    | 1,188   |
| Endocrinology    | 1,115        | 21,286      | 41    | 1,930   |
| Gastroenterology | 1,661        | 42,288      | 100   | 9,706   |
| General          | 51           | 2,287       | 191   | 13,952  |
| Gynecology       | 14,660       | 293,513     | 3,721 | 212,483 |
| Hematology       | 162          | 4,937       | 104   | 1,423   |
| Hepatology       | 380          | 7,414       | 115   | 3,894   |
| Infectious       | 97           | 9,658       | 35    | 767     |
| Internal         | 275          | 12,086      | 1,030 | 49,317  |
| Nephrology       | 372          | 7,846       | 144   | 4,830   |
| Neurology        | 1,181        | 33,551      | 198   | 6,976   |
| Oncology         | 223          | 5,364       | 12    | 202     |
| Ophthalmology    | 571          | 29,242      | 87    | 3,822   |
| Orthopedics      | 768          | 28,799      | 183   | 4,609   |
| Otolaryngology   | 1,621        | 49,787      | 462   | 26,231  |
| Pain             | 115          | 5,255       | 71    | 4,065   |
| Pediatrics       | 10,220       | 185,228     | 2,729 | 83,627  |
| Plastic          | 193          | 4,454       | 48    | 4,836   |
| Rehabilitation   | 37           | 3,330       | 98    | 6,611   |
| Respiratory      | 554          | 23,700      | 58    | 1,474   |
| Rheumatology     | 129          | 3,455       | 3     | 96      |
| Stomatology      | 422          | 22,259      | 130   | 4,014   |
| Surgical         | 212          | 16,801      | 150   | 7,549   |
| Traditional      | 405          | 5,304       | 185   | 16,931  |
| ThyroidBreast    | 545          | 24,183      | 312   | 20,512  |
| Urology          | 1,882        | 25,604      | 477   | 74,388  |
| Others           | 793          | 14,168      | 224   | 14,553  |

**Table A2** Summary Statistics for Consultation, Appointment, and Q&A with Top and Non-Top Doctors.

|                                          | Number  |        | Average Fee (Yuan) |        |
|------------------------------------------|---------|--------|--------------------|--------|
|                                          | Top     | NonTop | Top                | NonTop |
| Doctors                                  | 3,206   | 1,208  | –                  | –      |
| Consultation                             | 32,606  | 10,793 | 21.2               | 10.3   |
| Appointment                              | 971,523 | 76,452 | 13.9               | 6      |
| Q&A                                      | 4,692   | 7,009  | –                  | –      |
| Average Length of Questions (word count) | 67      | 67     |                    |        |
| Average Length of Answers (word count)   | 111     | 127    |                    |        |

**Table A3 Variables and Definitions.**

| Variable                                                                               | Definition                                                                                                                                                                            |
|----------------------------------------------------------------------------------------|---------------------------------------------------------------------------------------------------------------------------------------------------------------------------------------|
| $Gender_i$                                                                             | The gender of user $i$                                                                                                                                                                |
| $Age_i$                                                                                | The age of user $i$                                                                                                                                                                   |
| $City_i$                                                                               | The city of user $i$                                                                                                                                                                  |
| $Reg_i$                                                                                | The registration time of user $i$                                                                                                                                                     |
| $Consultation_{i,t}$                                                                   | The number of premium consultations purchased by user $i$ in month $t$                                                                                                                |
| $Appointment_{i,t}$                                                                    | The number of offline visit appointments made by user $i$ in month $t$                                                                                                                |
| $Browse_{i,t}$                                                                         | The number of Q&A sessions browsed by user $i$ in month $t$                                                                                                                           |
| $Spend_{i,t}$                                                                          | The expenditure of user $i$ on the consultation service in month $t$                                                                                                                  |
| $Consultation_{i,d,t}$ , $Appointment_{i,d,t}$ ,<br>$Browse_{i,d,t}$ , $Spend_{i,d,t}$ | The number of consultations purchased, appointments made, and Q&A sessions browsed, the expenditure on consultations, respectively, from doctors specialized in medical specialty $d$ |
| $Consultation\_TopDoc_{i,t}$ ,<br>$Appointment\_TopDoc_{i,t}$                          | The number of consultations purchased and appointments made by user $i$ in month $t$ with top-level doctors                                                                           |
| $Consultation\_TopDoc_{i,d,t}$ ,<br>$Appointment\_TopDoc_{i,d,t}$                      | The number of consultations purchased and appointments made by user $i$ in month $t$ with top-level doctors in medical specialty $d$                                                  |
| $Consultation\_SameDoc_{i,t}$ ,<br>$Appointment\_SameDoc_{i,t}$                        | The number of consultations purchased and appointments made with the same doctor who provided the Q&A service*                                                                        |
| $Con\_SameDepNonTopDoc_{i,t}$ ,<br>$App\_SameDepNonTopDoc_{i,t}$                       | The number of consultations and appointments with non-top non-focal doctors within the same medical department as the Q&A service*                                                    |
| $Con\_SameDepTopDoc_{i,t}$ ,<br>$App\_SameDepTopDoc_{i,t}$                             | The number of consultations and appointments with top non-focal doctors within the same medical department as the Q&A service*                                                        |
| $Consultation\_SameSpecialty_{i,t}$ ,<br>$Appointment\_SameSpecialty_{i,t}$            | The number of consultations and appointments within the same specialty as the Q&A service*                                                                                            |
| $Consultation\_DiffSpecialty_{i,t}$ ,<br>$Appointment\_DiffSpecialty_{i,t}$            | The number of consultations and appointments within the same specialty as the Q&A service*                                                                                            |
| $Consultation\_Complex_{i,t}$ ,<br>$Appointment\_Complex_{i,t}$                        | The number of consultations and appointments with doctors from complex specialties                                                                                                    |
| $Consultation\_General_{i,t}$ ,<br>$Appointment\_General_{i,t}$                        | The number of consultations and appointments with doctors from general specialties                                                                                                    |
| $Consultation\_Simple_{i,t}$ ,<br>$Appointment\_Simple_{i,t}$                          | The number of consultations and appointments with doctors from simple specialties                                                                                                     |

Note: \* Regarding defining same department (or doctor) visits for the control group, since we have matched adopters and non-adopters in almost all observable factors so that adopters purchasing the Q&A is close to a random selection, we assume that if the the control group users were to adopt the Q&A, they will visit the same department (or doctor) as the matched treated users.

**Table A4 Balance Check for the Full and the Matched Samples.**

| FULL SAMPLE                        |          |      |      |              |      |      |                      |
|------------------------------------|----------|------|------|--------------|------|------|----------------------|
| Variable                           | Adopters |      |      | Non-Adopters |      |      | Test                 |
|                                    | N        | Mean | SD   | N            | Mean | SD   |                      |
| # of Appointments                  | 9165     | 3.6  | 6.6  | 915554       | 1.1  | 2.8  | t=36.397***          |
| # of Consultations                 | 9165     | 0.81 | 4.8  | 915554       | 0.04 | 0.35 | t=15.451***          |
| # of Q&A Browsed                   | 9165     | 13   | 30   | 915554       | 0.57 | 6    | t=39.21***           |
| # of Q&A Purchased                 | 9165     | 1.3  | 1.1  | 915554       | 0    | 0    | t=113.54***          |
| # of Appointments (1 month prior)  | 9165     | 0.6  | 1.1  |              |      |      |                      |
| # of Consultations (1 month prior) | 9165     | 0.14 | 0.51 |              |      |      |                      |
| # of Q&A Browsed (1 month prior)   | 9165     | 3    | 9.5  |              |      |      |                      |
| Age                                | 8307     | 34   | 11   | 795665       | 39   | 13   | t=-38.571**          |
| Gender                             | 9165     |      |      | 915554       |      |      | $\chi^2=750.83$ ***  |
| ... Female                         | 6400     | 70%  |      | 508730       | 56%  |      |                      |
| ... Male                           | 2452     | 27%  |      | 355944       | 39%  |      |                      |
| ... Unknown                        | 313      | 3%   |      | 50880        | 6%   |      |                      |
| City                               | 9165     |      |      | 915554       |      |      | $\chi^2=186.806$ *** |
| ... XY                             | 7        | 0%   |      | 2812         | 0%   |      |                      |
| ... YC                             | 36       | 0%   |      | 4251         | 0%   |      |                      |
| ... ZJ                             | 12       | 0%   |      | 4688         | 1%   |      |                      |
| ... YZ                             | 2362     | 26%  |      | 236386       | 26%  |      |                      |
| ... XY                             | 4360     | 48%  |      | 383131       | 42%  |      |                      |
| ... HS                             | 2388     | 26%  |      | 284286       | 31%  |      |                      |
| MATCHED SAMPLE                     |          |      |      |              |      |      |                      |
| Variable                           | Adopters |      |      | Non-Adopters |      |      | Test                 |
|                                    | N        | Mean | SD   | N            | Mean | SD   |                      |
| # of Appointments (1 month prior)  | 5442     | 0.11 | 0.45 | 5442         | 0.11 | 0.45 | t=0                  |
| # of Consultations (1 month prior) | 5442     | 0    | 0    | 5442         | 0    | 0    | t=0                  |
| # of Q&A Browsed (1 month prior)   | 5442     | 1.3  | 3.3  | 5442         | 1.3  | 3.3  | t=0                  |
| Age                                | 5442     | 35   | 11   | 5442         | 35   | 11   | t=-0.98              |
| Gender                             | 5442     |      |      | 5442         |      |      | $\chi^2=0$           |
| ... Female                         | 3755     | 69%  |      | 3755         | 69%  |      |                      |
| ... Male                           | 1469     | 27%  |      | 1469         | 27%  |      |                      |
| ... Unknown                        | 218      | 4%   |      | 218          | 4%   |      |                      |
| City                               | 5442     |      |      | 5442         |      |      | $\chi^2=0$           |
| ... XY                             | 3        | 0%   |      | 3            | 0%   |      |                      |
| ... YC                             | 14       | 0%   |      | 14           | 0%   |      |                      |
| ... ZJ                             | 6        | 0%   |      | 6            | 0%   |      |                      |
| ... YZ                             | 1420     | 26%  |      | 1420         | 26%  |      |                      |
| ... XY                             | 2602     | 48%  |      | 2602         | 48%  |      |                      |
| ... HS                             | 1396     | 26%  |      | 1396         | 26%  |      |                      |

*Note:* For the full sample, the numbers of appointments, consultations and Q&A browsed or purchased are the numbers of such activities in the whole observation period. For the full sample, we also measure adopters' number of appointments, consultations and Q&A browsed 1 month before their first-time Q&A adoption (# of Appointments/Consultations/Q&A Browsed (1 month prior)). For the matched sample, the numbers of appointments, consultations and Q&A browsed or purchased are the numbers of such activities 1 month before the adoption month. The tenure of a user is measured in days since the users joined the platform and until the last day of the observation period. \*  $p < 0.10$ , \*\*  $p < 0.05$ , \*\*\*  $p < 0.01$ .

**Table A5** Estimates of Effects on the Raw Measures for Consultations, Appointments and Expenditures.

|                            | <i>Consultation</i>  | <i>Appointment</i>  | <i>Spend</i>       |
|----------------------------|----------------------|---------------------|--------------------|
| <i>Adopt</i> × <i>Post</i> | 0.033***<br>(0.0028) | 0.067***<br>(0.012) | 0.57***<br>(0.10)  |
| <i>Post</i>                | 0.017***<br>(0.0016) | 0.20***<br>(0.0096) | 0.26***<br>(0.033) |
| <i>N</i>                   | 101704               | 101704              | 101704             |
| adj. <i>R</i> <sup>2</sup> | 0.116                | 0.155               | 0.101              |

*Note:* Standard errors in parentheses are clustered at the user level. All regressions contain individual and time fixed effects.

\*  $p < 0.10$ , \*\*  $p < 0.05$ , \*\*\*  $p < 0.01$

**Table A6** Estimates on Effects in Post 1-3 Periods and Thereafter.

|                                          | <i>LogConsultation</i> | <i>LogAppointment</i> | <i>Spend</i>       | <i>LogSpend</i>      |
|------------------------------------------|------------------------|-----------------------|--------------------|----------------------|
| <i>Adopt</i> × <i>Post</i> <sub>1</sub>  | 0.054***<br>(0.0034)   | 0.14***<br>(0.0081)   | 1.49***<br>(0.22)  | 0.18***<br>(0.012)   |
| <i>Adopt</i> × <i>Post</i> <sub>2</sub>  | 0.016***<br>(0.0023)   | 0.077***<br>(0.0080)  | 0.41***<br>(0.12)  | 0.053***<br>(0.0079) |
| <i>Adopt</i> × <i>Post</i> <sub>3</sub>  | 0.014***<br>(0.0023)   | -0.0048<br>(0.0071)   | 0.32***<br>(0.081) | 0.043***<br>(0.0076) |
| <i>Adopt</i> × <i>Post</i> <sub>4f</sub> | 0.0093***<br>(0.0015)  | 0.0014<br>(0.0061)    | 0.33***<br>(0.080) | 0.031***<br>(0.0054) |
| <i>Post</i>                              | 0.0040***<br>(0.00084) | 0.080***<br>(0.0047)  | 0.12***<br>(0.030) | 0.013***<br>(0.0029) |
| <i>N</i>                                 | 101704                 | 101704                | 101704             | 101704               |
| adj. <i>R</i> <sup>2</sup>               | 0.122                  | 0.182                 | 0.104              | 0.112                |

*Note:* Standard errors in parentheses are clustered at the user level. All regressions contain individual and time fixed effects. For  $k = 1, 2, 3$ , *Post* <sub>$k$</sub>  is coded as 1 for the  $k_{th}$  week after the Q&A; *Post*<sub>4f</sub> is coded as 1 for the fourth week and beyond after the Q&A service.

\*  $p < 0.10$ , \*\*  $p < 0.05$ , \*\*\*  $p < 0.01$

**Table A7** The Effect for the Same Doctor Controlling for Browsing.

|                            | <i>LogCon_SameDoc</i>   | <i>LogApp_SameDoc</i>   |
|----------------------------|-------------------------|-------------------------|
| <i>Adopt</i> × <i>Post</i> | 0.0012***<br>(0.00029)  | 0.00035<br>(0.00026)    |
| <i>Post</i>                | 0.00076***<br>(0.00017) | -0.00012<br>(0.00016)   |
| <i>LogBrowse</i>           | 0.0016***<br>(0.00039)  | -0.000027<br>(0.000053) |
| <i>N</i>                   | 101704                  | 101704                  |
| adj. <i>R</i> <sup>2</sup> | 0.060                   | 0.074                   |

*Note:* Standard errors in parentheses are clustered at the user level. All regressions contain individual and time fixed effects.

\*  $p < 0.10$ , \*\*  $p < 0.05$ , \*\*\*  $p < 0.01$

**Table A8** The Results of Users Coming Back to Platform for Service after Six Months.

|                            | <i>LogConsultation</i> | <i>LogAppointment</i> |
|----------------------------|------------------------|-----------------------|
| <i>Adopt</i> × <i>Post</i> | 0.010***<br>(0.0037)   | 0.026<br>(0.028)      |
| <i>Post</i>                | 0.0064<br>(0.0051)     | 0.040<br>(0.045)      |
| <i>N</i>                   | 8383                   | 8383                  |
| adj. <i>R</i> <sup>2</sup> | 0.023                  | 0.153                 |

*Note:* Standard errors in parentheses are clustered at the user level. All regressions contain individual and time fixed effects. In this analysis, we consider a subsample of users who have made an consultation/appointment within six months after the Q&A service, and estimate the impact on the number of consultations and appointments before Q&A vs. post six months after Q&A.

\*  $p < 0.10$ , \*\*  $p < 0.05$ , \*\*\*  $p < 0.01$

**Table A9** The Effect on Revisits for Old Users.

|                                                           | $\kappa = 1$ : one month after Q&A |                  | $\kappa = 2$ : two months after Q&A |                   | $\kappa = 3$ : three months after Q&A |                    |
|-----------------------------------------------------------|------------------------------------|------------------|-------------------------------------|-------------------|---------------------------------------|--------------------|
|                                                           | <i>LogCon</i>                      | <i>LogApp</i>    | <i>LogCon</i>                       | <i>LogApp</i>     | <i>LogCon</i>                         | <i>LogApp</i>      |
| <i>Adopt</i> × <i>Post</i> <sub><math>\kappa</math></sub> | -0.032<br>(0.022)                  | 0.057<br>(0.070) | -0.026***<br>(0.007)                | -0.011<br>(0.036) | -0.011*<br>(0.007)                    | -0.047*<br>(0.027) |
| <i>Post</i> <sub><math>\kappa</math></sub>                | -0.11<br>(0.18)                    | -0.32<br>(0.43)  | 0.018*<br>(0.010)                   | 0.014<br>(0.033)  | 0.016**<br>(0.0068)                   | 0.10***<br>(0.023) |
| <i>N</i>                                                  | 796                                | 796              | 1899                                | 1899              | 3121                                  | 3121               |
| adj. <i>R</i> <sup>2</sup>                                | 0.018                              | 0.477            | 0.143                               | 0.4               | 0.201                                 | 0.365              |

*Note:* Standard errors in parentheses are clustered at the user level. All regressions contain individual and time fixed effects.

\*  $p < 0.10$ , \*\*  $p < 0.05$ , \*\*\*  $p < 0.01$

**Table A10 Balance Check for the Field Experiment.**

| <b>Week 1</b>                      |             | <b>A</b>  |             | <b>B</b>  |             | <b>C</b>  |                  | <b>Test</b> |
|------------------------------------|-------------|-----------|-------------|-----------|-------------|-----------|------------------|-------------|
| <b>Variable</b>                    | <b>Mean</b> | <b>SD</b> | <b>Mean</b> | <b>SD</b> | <b>Mean</b> | <b>SD</b> |                  |             |
| Age                                | 36          | 17        | 36          | 16        | 36          | 16        | t=0.39           |             |
| Gender                             |             |           |             |           |             |           | $\chi^2=2.056$   |             |
| ... Female                         | 57%         |           | 57%         |           | 57%         |           |                  |             |
| ... Male                           | 41%         |           | 41%         |           | 41%         |           |                  |             |
| ... Unknown                        | 2%          |           | 2%          |           | 2%          |           |                  |             |
| Tenure                             | 323         | 249       | 324         | 249       | 323         | 248       | t=0.91           |             |
| # of Q&A (1 month prior)           | 0.001       | 0.035     | 0.0011      | 0.035     | 0.001       | 0.035     | t=0.66           |             |
| # of Consultations (1 month prior) | 0.0062      | 0.11      | 0.0069      | 0.11      | 0.0063      |           | t=1.68*          |             |
| # of Appointments (1 month prior)  | 0.14        | 0.56      | 0.14        | 0.57      | 0.14        | 0.56      | t=1.62*          |             |
| <b>Week 2</b>                      |             | <b>A</b>  |             | <b>B</b>  |             | <b>C</b>  |                  | <b>Test</b> |
| <b>Variable</b>                    | <b>Mean</b> | <b>SD</b> | <b>Mean</b> | <b>SD</b> | <b>Mean</b> | <b>SD</b> |                  |             |
| Age                                | 36          | 16        | 36          | 16        | 36          | 17        | t=0.97           |             |
| Gender                             |             |           |             |           |             |           | $\chi^2=1.626$   |             |
| ... Female                         | 57%         |           | 57%         |           | 57%         |           |                  |             |
| ... Male                           | 41%         |           | 41%         |           | 41%         |           |                  |             |
| ... Unknown                        | 2%          |           | 2%          |           | 2%          |           |                  |             |
| Tenure                             | 323         | 248       | 323         | 248       | 324         | 249       | t=1.11           |             |
| # of Q&A (1 month prior)           | 0.00096     | 0.034     | 0.0011      | 0.036     | 0.001       | 0.035     | t=1.44           |             |
| # of Consultations (1 month prior) | 0.0063      | 0.11      | 0.0065      | 0.11      | 0.0066      | 0.12      | t=0.84           |             |
| # of Appointments (1 month prior)  | 0.14        | 0.56      | 0.14        | 0.56      | 0.14        | 0.56      | t=0.94           |             |
| <b>Week 3</b>                      |             | <b>A</b>  |             | <b>B</b>  |             | <b>C</b>  |                  | <b>Test</b> |
| <b>Variable</b>                    | <b>Mean</b> | <b>SD</b> | <b>Mean</b> | <b>SD</b> | <b>Mean</b> | <b>SD</b> |                  |             |
| Age                                | 36          | 16        | 36          | 16        | 36          | 17        | t=0.66           |             |
| Gender                             |             |           |             |           |             |           | $\chi^2=7.981^*$ |             |
| ... Female                         | 57%         |           | 57%         |           | 57%         |           |                  |             |
| ... Male                           | 41%         |           | 41%         |           | 41%         |           |                  |             |
| ... Unknown                        | 2%          |           | 2%          |           | 2%          |           |                  |             |
| Tenure                             | 323         | 248       | 324         | 249       | 324         | 249       | t=1.19           |             |
| # of Q&A (1 month prior)           | 0.00099     | 0.033     | 0.0011      | 0.037     | 0.001       | 0.034     | t=1.16           |             |
| # of Consultations (1 month prior) | 0.0065      | 0.11      | 0.0065      | 0.11      | 0.0064      | 0.11      | t=0.26           |             |
| # of Appointments (1 month prior)  | 0.14        | 0.56      | 0.14        | 0.55      | 0.14        | 0.57      | t=0.40           |             |
| <b>Week 4</b>                      |             | <b>A</b>  |             | <b>B</b>  |             | <b>C</b>  |                  | <b>Test</b> |
| <b>Variable</b>                    | <b>Mean</b> | <b>SD</b> | <b>Mean</b> | <b>SD</b> | <b>Mean</b> | <b>SD</b> |                  |             |
| Age                                | 36          | 17        | 36          | 16        | 36          | 16        | t=1.13           |             |
| Gender                             |             |           |             |           |             |           | $\chi^2=1.741$   |             |
| ... Female                         | 57%         |           | 57%         |           | 57%         |           |                  |             |
| ... Male                           | 41%         |           | 41%         |           | 41%         |           |                  |             |
| ... Unknown                        | 2%          |           | 2%          |           | 2%          |           |                  |             |
| Tenure                             | 323         | 249       | 324         | 249       | 324         | 248       | t=0.56           |             |
| # of Q&A (1 month prior)           | 0.001       | 0.034     | 0.0011      | 0.035     | 0.001       | 0.036     | t=0.71           |             |
| # of Consultations (1 month prior) | 0.0064      | 0.11      | 0.0065      | 0.11      | 0.0065      | 0.11      | t=0.35           |             |
| # of Appointments (1 month prior)  | 0.14        | 0.56      | 0.14        | 0.56      | 0.14        | 0.56      | t=0.25           |             |

*Note:* The numbers of appointments, consultations and Q&As are the numbers of such activities in 1 month before the experiment. The tenure of a user is measured in days since the users joined the platform and until the starting date of the experiment. \*  $p < 0.10$ , \*\*  $p < 0.05$ , \*\*\*  $p < 0.01$ .

## A.2. Matching Strategy

To put it more concretely, for each adopter, we find a non-adopter following the criteria summarized in Table A11.

**Table A11 Matching on Propensity Score and Covariates.**

| Variables                         | Matching Criteria     |
|-----------------------------------|-----------------------|
| $PropensityScore_{i,t}$           | Within range of 0.001 |
| $Gender_i$                        | Exact match           |
| $City_i$                          | Exact match           |
| $Age_i$                           | Within range of 5     |
| $Appointment_{i,d,t-1\&-2}$       | Exact match           |
| $Appointment\_Top_{i,d,t-1}$      | Exact match           |
| $CumulativeAppointment_{i,d,t-1}$ | Within range of 1     |
| $Browse_{i,d,t-1}$                | Exact match           |
| $Browse_{i,d,t-2}$                | Within range of 1     |
| $ t - t' $                        | Within range of 6     |

Besides the conditions listed above, we also use topic distribution of Q&A browsed by adopters and non-adopters for matching. In what follows, we describe these matching process for the topics.

Firstly, we combine dialogues of consultations and Q&A browsed for each medical specialty and conduct LDA for texts of each specialty separately. Analysis using LDA to identify pairs of items with similar text characteristics has been applied by IS researchers (e.g. Lee et al. (2020)). The best number of topics is selected based on Cao et al. (2009) and Deveaud et al. (2014). Here, each specialty may end up with different number of topics. Then, for each adopter who has browsed an existing Q&A before purchasing his/her own, we identify non-adopters who also have browsed Q&As within the same specialty and with similar distribution over topics as matching candidates. Regarding similarity, we set calipers on the largest difference in the probabilities over topics. The comparison of topic distributions between adopters and their matched non-adopters are shown in Figure A4.

### A.3. Additional Analysis the for the Experiment

To provide additional support for the effects we have discovered and examine robustness of our findings from the experiment, we conduct several supplemental analyses based on the experiment data. We first repeat the two-stage estimation on the full sample of the data. Also, the direct impact of coupons on online and offline visits is estimated. Lastly, we provide additional statistics for supporting the implementation of the matched sample for the analysis.

Table A12 presents the two-stage IV estimation for the full sample. Assigning users to Group A, which received a deeper discount, provides a marginally higher incentive for purchasing the Q&A service. However, when applying the Stock and Yogo test (Stock and Yogo 2005), the first-stage estimation fails to reject the null hypothesis that the instruments are weak. A plausible reason is that only users with medical conditions are likely to adopt the Q&A service and hence assignment of coupons cannot explain adoption. We also estimate the direct impact of coupons on users acquiring consultation and appointment services for both full and matched samples. Table A13 suggests that coupons only have a marginally significant effect for online consultations and

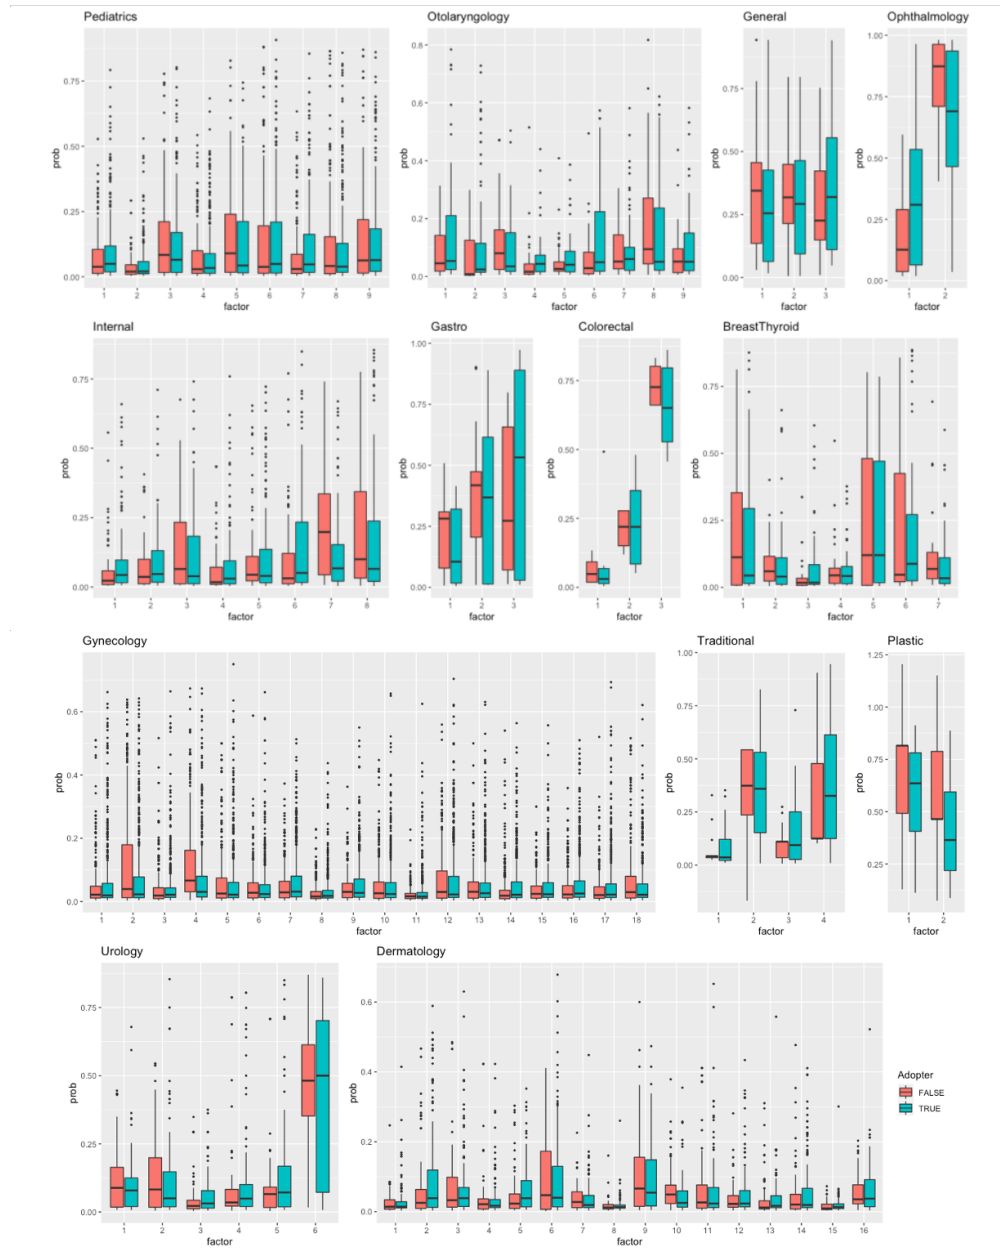

**Figure A4** Comparison between Adopters and Matching Candidates of Non-Adopters for Topic Distributions for Each Medical Specialty.

appointments for the matched sample. This underscores the importance of Q&A in influencing the online and offline visits. The direct effect of coupons is even weaker for the full sample. Coupons have no effect on online consultations and a marginally positive effect on online consultations.

Although our sample is balanced across different coupon treatments, there are systematic differences between Q&A adopters and non-adopters in the full sample, as shown in Table A14(a). These differences disappear when we use a matched sample (Table A14(b)). The observed differences can be attributed to unobserved variations in health conditions. Typically, users with immediate health

**Table A12 The Results of the Experiment – Full Sample.**

|                            | First Stage             |  | Second Stage   |                  |
|----------------------------|-------------------------|--|----------------|------------------|
|                            | Q&A                     |  | Consultation   | Appointment      |
| <i>GroupA</i>              | 0.000099*<br>(0.000065) |  |                |                  |
| <i>GroupB</i>              | 0.000049<br>(0.000043)  |  |                |                  |
| Q&A                        |                         |  | 0.50<br>(0.43) | 0.64**<br>(0.28) |
| <i>N</i>                   | 3567924                 |  | 3567924        | 3567924          |
| adj. <i>R</i> <sup>2</sup> | 0.043                   |  | 0.0090         | 0.0022           |

*Note:* Standard errors in parentheses are clustered at the user level. All regressions contain individual and time fixed effects.

\*  $p < 0.10$ , \*\*  $p < 0.05$ , \*\*\*  $p < 0.01$

**Table A13 The Direct Impact of Coupons on Consultations and Appointments during the Experiment.**

|                            | Matched Sample       |                      | Full Sample            |                       |
|----------------------------|----------------------|----------------------|------------------------|-----------------------|
|                            | Consultation         | Appointment          | Consultation           | Appointment           |
| <i>GroupA</i>              | 0.025772*<br>(0.014) | 0.052686*<br>(0.026) | 0.000054<br>(0.000049) | 0.00063*<br>(0.00032) |
| <i>GroupB</i>              | 0.025611*<br>(0.014) | 0.048477*<br>(0.026) | 0.000047<br>(0.000049) | 0.00025<br>(0.00028)  |
| <i>N</i>                   | 2832                 | 2832                 | 3567924                | 3567924               |
| adj. <i>R</i> <sup>2</sup> | 0.140                | 0.056                | 0.544                  | 0.237                 |

*Note:* Standard errors in parentheses are clustered at the user level. All regressions contain individual and time fixed effects.

\*  $p < 0.10$ , \*\*  $p < 0.05$ , \*\*\*  $p < 0.01$

needs are more likely to adopt the Q&A service. Even when coupons are randomly allocated, those with urgent health requirements are more inclined to use them. As a result, users who claim coupons are typically those with immediate medical needs, while those who do not claim the coupons are likely to have no immediate health concerns. In contrast, the group of users without coupons would include both those with and without immediate medical needs due to randomization.

Regarding the differences in effect sizes between the main analysis (Table 3) and the experimental results (Table 25), these differences are likely driven by variations in sample sizes and the popularity of different services over time. Our main analysis covers the entire panel period from March 2016 to April 2019, whereas our experimental sample is from September 2019. To address this concern, we estimated the impact of Q&A on consultations and appointments for a subsample of matched users during the experiment period who did not claim the coupons (Table A15). The estimated effect of Q&A on online consultations and appointments for this subsample is of the same order of magnitude as observed in the experimental results (Table 25).

**Table A14 Balance Check for the Full and the Matched Samples during the Experiment.**

| Variable                     | (a) Full Sample |       |         |      |                    | (b) Matched Sample |      |         |      |                |
|------------------------------|-----------------|-------|---------|------|--------------------|--------------------|------|---------|------|----------------|
|                              | Non-Adopter     |       | Adopter |      | Test               | Non-Adopter        |      | Adopter |      | Test           |
|                              | Mean            | SD    | Mean    | SD   |                    | Mean               | SD   | Mean    | SD   |                |
| Age                          | 36              | 17    | 32      | 13   | t=6.08***          | 34                 | 15   | 34      | 13   | t=0.15         |
| Gender                       |                 |       |         |      | $\chi^2=37.48$ *** |                    |      |         |      | $\chi^2=1.534$ |
| ... Female                   | 57%             |       | 70%     |      |                    | 72%                |      | 74%     |      |                |
| ... Male                     | 41%             |       | 29%     |      |                    | 27%                |      | 25%     |      |                |
| ... Unknown                  | 2%              |       | 1%      |      |                    | 0%                 |      | 1%      |      |                |
| Tenure                       | 324             | 249   | 280     | 243  | t=4.03***          | 254                | 225  | 271     | 233  | t=1.15         |
| Q&A (1 month prior)          | 0.00099         | 0.034 | 0.093   | 0.36 | t=60.77***         | 0.033              | 0.24 | 0.055   | 0.27 | t=1.34         |
| Consultation (1 month prior) | 0.0064          | 0.11  | 0.17    | 0.73 | t=34.48***         | 0.094              | 0.61 | 0.14    | 0.71 | t=1.12         |
| Appointment (1 month prior)  | 0.14            | 0.56  | 0.76    | 1.5  | t=25.49***         | 0.63               | 1.5  | 0.61    | 1.4  | t=0.25         |

*Note:* The numbers of Q&As, consultations and appointments are the numbers of such activities in 1 month before the experiment. The tenure of a user is measured in days since the users joined the platform and until the starting date of the experiment. \*  $p < 0.10$ , \*\*  $p < 0.05$ , \*\*\*  $p < 0.01$ .

**Table A15 The Impact of Q&A on Consultations and Appointments for Unclaimed Matched Users in the Experiment.**

|            | <i>Consultation</i> | <i>Appointment</i> |
|------------|---------------------|--------------------|
| Q&A        | 0.18***<br>(0.017)  | 0.23***<br>(0.031) |
| <i>N</i>   | 2392                | 2392               |
| adj. $R^2$ | 0.26                | 0.29               |

*Note:* Standard errors in parentheses are clustered at the user level. All regressions contain individual and time fixed effects.

\*  $p < 0.10$ , \*\*  $p < 0.05$ , \*\*\*  $p < 0.01$
